# Supplementary material for: The evolution and role of the hyposphene-hypantrum articulation in Archosauria: phylogeny, size and/or mechanics?
Source: R Soc Open Sci. 2019 Oct 2;6(10):190258. doi: 10.1098/rsos.190258 (PMC6837189; doi:10.1098/rsos.190258)
Supplement: Theropod Tree [file rsos190258supp3.nex]

#NEXUS
[written Thu Mar 22 15:05:44 EDT 2018 by Mesquite  version 3.40 (build 877) at candiceanicsmbp.uhmc.sbuh.stonybrook.edu/172.31.74.68]

BEGIN TAXA;
	TITLE Taxa;
	DIMENSIONS NTAX=27;
	TAXLABELS
		Aves Archaeopteryx Saurornitholestes Deinonychus Velociraptor Achillobator Mahakala Shanag Rahonavis Buitreraptor Unenlagia Austroraptor Microraptor Saurornithoides Troodon Microvenator Gigantoraptor Avimimus Mononykus Parvicursor Patagonykus Haplocheirus Deinocheirus Struthiomimus Tyrannosaurus Ornitholestes Allosaurus 
	;

END;


BEGIN CHARACTERS;
	TITLE  'Hyposphene-hypantrum Theropoda';
	DIMENSIONS  NCHAR=1;
	FORMAT DATATYPE = STANDARD GAP = - MISSING = ? SYMBOLS = "  0 1";
	MATRIX
	Aves               0
	Archaeopteryx      0
	Saurornitholestes  ?
	Deinonychus        1
	Velociraptor       1
	Achillobator       1
	Mahakala           0
	Shanag             ?
	Rahonavis          0
	Buitreraptor       ?
	Unenlagia          1
	Austroraptor       ?
	Microraptor        ?
	Saurornithoides    1
	Troodon            1
	Microvenator       0
	Gigantoraptor	   1
	Avimimus           1
	Mononykus          0
	Parvicursor        0
	Patagonykus        1
	Haplocheirus       1
	Deinocheirus       1
	Struthiomimus      1
	Tyrannosaurus      1
	Ornitholestes      1
	Allosaurus         1

;

END;
BEGIN ASSUMPTIONS;
	OPTIONS DEFTYPE = unord PolyTcount = MAXSTEPS;
	TYPESET * UNTITLED   =  unord:  1;

END;

BEGIN TREES;
	Title 'Theropod Tree';
	ID 016244bd00061;
	LINK Taxa = Taxa;
	TRANSLATE
[0] 		1 Aves,
[1] 		2 Archaeopteryx,
[2] 		3 Saurornitholestes,
[3] 		4 Deinonychus,
[4] 		5 Velociraptor,
[5] 		6 Achillobator,
[6] 		7 Mahakala,
[7] 		8 Shanag,
[8] 		9 Rahonavis,
[9] 		10 Buitreraptor,
[10] 		11 Unenlagia,
[11] 		12 Austroraptor,
[12] 		13 Microraptor,
[13] 		14 Saurornithoides,
[14] 		15 Troodon,
[15] 		16 Microvenator,
[16] 		17 Gigantoraptor,
[17]		18 Avimimus
[18] 		19 Mononykus,
[19] 		20 Parvicursor,
[20] 		21 Patagonykus,
[21] 		22 Haplocheirus,
[22] 		23 Deinocheirus,
[23] 		24 Struthiomimus,
[24] 		25 Tyrannosaurus,
[25] 		26 Ornitholestes,
[26] 		27 Allosaurus;
	TREE theropodtree = ((((((((1,2),(((((12,11,10),9),(13,8,((3,(4,5)),6))),7),(14,15))),((16,17),18),(((19,20),21),22)),(23,24)),25),26),27);

END;
